# Supplementary material for: Advanced dual-atom catalysts on graphitic carbon nitride for enhanced hydrogen evolution via water splitting
Source: Royal Society of Chemistry journal article supplement (doi:10.1039/d4nr01241k), 2024-01-01
Supplement: d4nr01241k1.pdf [file d4nr01241k1.pdf]

## Advanced Dual-Atom Catalysts on Graphitic Carbon Nitride for Enhanced Hydrogen Evolution via Water Splitting

Xinghui Liu,<sup>[a]</sup> Dang Kim Hoang,<sup>[b]</sup> Quynh Anh T. Nguyen,<sup>[b]</sup> Do Dinh Phuc,<sup>[c]</sup> Seong-Gon Kim,<sup>[d]</sup> Pham Cam Nam,<sup>[e]</sup> Ashwani Kumar,<sup>[f]</sup> Fuchun Zhang,<sup>[g]</sup> Chunyi Zhi,<sup>[h]</sup> and Viet Q. Bui\*<sup>[b]</sup>

[a] School of Physics and Electronic Information, Yan'an University, Yan'an 716000, China; Science and Technology on Aerospace Chemical Power Laboratory, Hubei Institute of Aerospace Chemotechnology, Xiangyang 441003, China; Department of Materials Science and Engineering, City University of Hong Kong, 83 Tat Chee Avenue, Kowloon, Hong Kong SAR, China.

[b] Advanced Institute of Science and Technology, The University of Danang, 41 Le Duan, Danang, Vietnam.

[c] Department of Chemistry, Sungkyunkwan University, Suwon, 16419, Republic of Korea.

[d] Department of Physics & Astronomy and Center for Computational Sciences, Mississippi State University, Starkville, Mississippi 39762, United States.

[e] Faculty of Chemical Engineering, The University of Danang-University of Science and Technology, Danang City 550000, Vietnam.

[f] Max-Planck-Institut für Kohlenforschung, 45470 Mülheim an der Ruhr, Germany.

[g] School of Physics and Electronic Information, Yan'an University, Yan'an 716000, China.

[h] Department of Materials Science and Engineering, City University of Hong Kong, 83 Tat Chee Avenue, Kowloon, Hong Kong SAR, China.

\* Corresponding author: Viet Q.Bui; E-mail: [mrquocviet@gmail.com](mailto:mrquocviet@gmail.com); [bqviet@ac.udn.vn](mailto:bqviet@ac.udn.vn)

**Table S1.** Bader charge and magnetic moment analysis for dual-atom catalysts (DACs) in MN-gCN Structures. This table presents the Bader charge values for metal atoms M and N, their sum, and the average magnetic moment ( $\text{Avg}_{\mu_B}$ ) of MN-gCN configurations.

| DACs (MN) | Bader charge of M ( $e$ ) | Bader charge of N ( $e$ ) | Sum ( $e$ ) | $\text{Avg}_{\mu_B}$ (MN-gCN) ( $\mu_B$ ) |
|-----------|---------------------------|---------------------------|-------------|-------------------------------------------|
| CrFe      | 1.293                     | 0.120                     | 1.413       | 3.314                                     |
| FeFe      | 0.807                     | 0.724                     | 1.530       | 3.705                                     |
| FeCu      | 0.834                     | 0.554                     | 1.388       | 3.102                                     |
| FeNi      | 0.815                     | 0.519                     | 1.333       | 1.942                                     |
| CoIr      | 0.932                     | -0.148                    | 0.784       | 1.482                                     |
| MnCo      | 0.546                     | 0.654                     | 1.200       | 3.564                                     |
| CoRu      | 0.503                     | 0.507                     | 1.010       | 2.507                                     |
| CoPt      | 0.563                     | 0.421                     | 0.984       | 0.559                                     |
| CoCo      | 0.630                     | 0.633                     | 1.263       | 1.558                                     |
| CoNi      | 0.625                     | 0.471                     | 1.095       | 0.374                                     |
| FeCo      | 0.511                     | 0.649                     | 1.160       | 2.341                                     |
| CrCo      | 1.013                     | 0.498                     | 1.510       | 2.488                                     |
| CoCu      | 0.605                     | 0.596                     | 1.201       | 0.000                                     |
| CoPd      | 0.647                     | 0.462                     | 1.110       | 0.000                                     |
| CrPd      | 0.824                     | 0.489                     | 1.313       | 3.399                                     |
| CuPd      | 0.529                     | 0.618                     | 1.148       | 0.082                                     |
| MnPd      | 0.648                     | 0.447                     | 1.095       | 2.671                                     |
| NiPd      | 0.581                     | 0.588                     | 1.170       | 0.000                                     |
| FePd      | 0.969                     | 0.361                     | 1.330       | 2.009                                     |
| PdPd      | 0.643                     | 0.551                     | 1.194       | 0.000                                     |
| CrMn      | 0.989                     | 0.695                     | 1.683       | 0.103                                     |
| MnCu      | 0.996                     | 0.455                     | 1.451       | 3.163                                     |
| MnNi      | 1.100                     | 0.165                     | 1.264       | 2.672                                     |
| MnMn      | 0.723                     | 0.816                     | 1.540       | 1.764                                     |
| MnFe      | 0.843                     | 0.497                     | 1.340       | 2.375                                     |
| PtPt      | 0.406                     | 0.434                     | 0.840       | 0.000                                     |
| CuPt      | 0.590                     | 0.098                     | 0.688       | 0.000                                     |
| NiPt      | 0.532                     | 0.192                     | 0.724       | 0.000                                     |
| MnPt      | 0.566                     | 0.591                     | 1.157       | 2.829                                     |
| FePt      | 0.973                     | -0.240                    | 0.733       | 1.995                                     |
| PdPt      | 0.296                     | 0.203                     | 0.500       | 0.000                                     |
| CrPt      | 0.415                     | -0.792                    | -0.377      | 2.965                                     |
| CrRu      | 0.823                     | 0.608                     | 1.431       | 1.496                                     |
| FeRu      | 0.950                     | 0.691                     | 1.641       | 0.007                                     |
| NiRu      | 0.644                     | 0.631                     | 1.275       | 1.312                                     |
| CuRu      | 0.110                     | 0.828                     | 0.938       | 0.001                                     |
| MnRu      | 0.880                     | 0.142                     | 1.022       | 2.335                                     |
| PdRu      | 0.273                     | 0.621                     | 0.894       | 0.000                                     |
| PtRu      | 0.230                     | 0.777                     | 1.007       | 0.000                                     |
| RuRu      | 0.464                     | 0.582                     | 1.046       | 0.000                                     |
| IrIr      | 0.733                     | 0.760                     | 1.493       | 0.000                                     |
| NiIr      | 0.450                     | 0.464                     | 0.914       | 0.000                                     |

|      |       |        |       |        |
|------|-------|--------|-------|--------|
| PtIr | 0.470 | 0.225  | 0.696 | 0.000  |
| MnIr | 0.756 | 0.280  | 1.036 | 3.402  |
| PdIr | 0.473 | 0.048  | 0.521 | 0.000  |
| FeIr | 0.944 | 0.021  | 0.965 | 2.641  |
| CuIr | 0.762 | -0.242 | 0.520 | 0.000  |
| RuIr | 0.806 | 0.356  | 1.162 | 0.123  |
| CrNi | 1.144 | -0.026 | 1.118 | 3.700  |
| NiNi | 0.314 | 0.559  | 0.873 | 0.000  |
| NiCu | 0.339 | 0.148  | 0.487 | -0.961 |
| CrIr | 0.922 | 0.421  | 1.344 | 2.318  |
| CrCr | 0.705 | 0.834  | 1.539 | 0.300  |
| CrCu | 1.216 | 0.492  | 1.709 | 3.025  |
| CuCu | 0.457 | 0.616  | 1.073 | 0.029  |

**Table S2** presents a comprehensive evaluation of the energetic characteristics of heteronuclear and homonuclear metal dimers anchored on gCN. It details the computed binding energies ( $E_b$ ), indicative of the interaction strength between bimetallic single-atoms and the g-CN substrate, the formation energies ( $E_{\text{form}}$ ) which reflect the stability of the constructed DACs, and the dissolution potentials ( $U_{\text{diss}}$ ) that provide insights into the electrochemical durability of the catalysts under study.

| M-N  | $E_b$<br>(eV) | $E_{\text{form}}$<br>(eV) | $U_{\text{diss}}$<br>(V) |
|------|---------------|---------------------------|--------------------------|
| FeNi | -5.222        | -0.389                    | -0.154                   |
| CrIr | -5.868        | -0.192                    | 0.256                    |
| PdPt | -4.943        | -0.380                    | 1.273                    |
| MnFe | -4.479        | -0.523                    | -0.543                   |
| FeCu | -4.246        | -0.139                    | 0.020                    |
| CrMn | -4.526        | -0.948                    | -0.561                   |
| NiPt | -5.769        | -0.613                    | 0.768                    |
| CrNi | -5.105        | -0.649                    | -0.254                   |
| CuPt | -4.715        | -0.285                    | 0.903                    |
| FePt | -5.506        | -0.428                    | 0.584                    |
| CrRu | -5.529        | -0.042                    | -0.201                   |
| FeCo | -5.299        | -0.278                    | -0.219                   |
| CoCo | -5.423        | -0.137                    | -0.208                   |
| CuPd | -3.841        | -0.248                    | 0.789                    |
| MnIr | -5.863        | -0.610                    | 0.400                    |
| NiIr | -6.235        | -0.104                    | 0.519                    |
| FeIr | -6.117        | -0.064                    | 0.401                    |
| CrCo | -5.032        | -0.389                    | -0.394                   |
| MnRu | -5.512        | -0.447                    | -0.134                   |
| CrPt | -5.182        | -0.481                    | 0.380                    |
| MnNi | -5.099        | -1.065                    | -0.181                   |
| CrFe | -4.458        | -0.079                    | -0.630                   |
| CoPt | -5.635        | -0.292                    | 0.598                    |
| MnCo | -5.048        | -0.826                    | -0.310                   |
| CoCu | -4.583        | -0.210                    | 0.138                    |
| CrCu | -4.220        | -0.489                    | -0.034                   |
| NiCu | -4.558        | -0.372                    | 0.229                    |
| CrCr | -4.629        | -0.628                    | -0.586                   |
| PtPt | -5.867        | -0.467                    | 1.413                    |
| CuCu | -3.726        | -0.266                    | 0.475                    |
| NiNi | -5.528        | -0.617                    | 0.052                    |
| PdPd | -4.085        | -0.359                    | 1.166                    |
| FePd | -4.573        | -0.332                    | 0.440                    |
| FeFe | -5.025        | -0.270                    | -0.305                   |
| MnMn | -4.198        | -1.041                    | -0.649                   |
| CoNi | -5.448        | -0.350                    | -0.092                   |
| MnCu | -4.065        | -0.757                    | -0.036                   |
| MnPd | -4.388        | -0.947                    | 0.382                    |
| MnPt | -5.287        | -1.008                    | 0.509                    |
| CoPd | -4.781        | -0.275                    | 0.493                    |

|      |        |        |        |
|------|--------|--------|--------|
| NiPd | -4.866 | -0.547 | 0.639  |
| CrPd | -4.384 | -0.521 | 0.304  |
| PtRu | -6.017 | 0.170  | 0.732  |
| CuIr | -5.397 | 0.008  | 0.744  |
| CuRu | -4.909 | 0.307  | 0.245  |
| PtIr | -6.272 | 0.103  | 1.099  |
| FeRu | -5.715 | 0.149  | -0.067 |
| CoRu | -5.925 | 0.204  | -0.013 |
| IrIr | -3.495 | 3.856  | -2.700 |
| RuIr | -6.764 | 0.398  | 0.540  |
| PdRu | -5.107 | 0.243  | 0.600  |
| CoIr | -6.226 | 0.092  | 0.378  |
| RuRu | -6.679 | 0.295  | 0.308  |
| NiRu | -5.723 | 0.219  | -0.011 |
| PdIr | -5.433 | 0.105  | 1.002  |

---

**Table S3.** Transition metal interaction with hydrogen adsorbates. This table provides comprehensive data on the adsorption of hydrogen (H\*) in combination with different transition metals (TMs) on MN-gCN surfaces. Each row lists a metal pair (MN), the distance between hydrogen and the transition metal (H-TM distance in Å), the Bader charge of the adsorbed hydrogen (H\* Bader charge), the integrated crystal orbital Hamilton population (iCOHP) between H\* and TM, magnetic moment ( $\mu_B$ ) for activated metal site, and the Gibbs free energy change ( $\Delta G_{H^*}$ ) for hydrogen adsorption (in eV).

| MN   | H-TM distance<br>(Å) | H* Bader charge<br>(e) | H-TM iCOHP<br>(eV) | $\mu_B$<br>(active site) | $\Delta G_{H^*}$<br>(eV) |
|------|----------------------|------------------------|--------------------|--------------------------|--------------------------|
| CrFe | 1.566                | -0.351                 | -0.903             | 2.083                    | -0.824                   |
| FeFe | 1.610                | -0.164                 | -0.839             | 2.218                    | -0.556                   |
| FeCu | 1.609                | -0.215                 | -0.840             | 2.931                    | -0.552                   |
| FeNi | 1.621                | -0.150                 | -0.822             | 2.469                    | -0.469                   |
| CoIr | 1.511                | -0.647                 | -0.936             | 1.395                    | -1.006                   |
| MnCo | 1.532                | -0.626                 | -0.944             | 0.419                    | -0.923                   |
| CoRu | 1.539                | -0.554                 | -0.915             | 1.482                    | -0.901                   |
| CoPt | 1.544                | -0.593                 | -0.910             | 0.958                    | -0.887                   |
| CoCo | 1.559                | -0.427                 | -0.888             | 1.080                    | -0.872                   |
| CoNi | 1.577                | -0.533                 | -0.910             | 0.792                    | -0.777                   |
| FeCo | 1.568                | -0.477                 | -0.900             | 0.805                    | -0.657                   |
| CrCo | 1.559                | -0.528                 | -0.896             | -0.912                   | -0.656                   |
| CoCu | 1.581                | -0.495                 | -0.888             | 0.000                    | -0.619                   |
| CoPd | 1.599                | -0.482                 | -0.853             | 0.000                    | -0.514                   |
| CrPd | 1.641                | -0.347                 | -0.920             | -0.060                   | -0.393                   |
| CuPd | 1.652                | -0.159                 | -0.908             | 0.022                    | -0.242                   |
| MnPd | 1.677                | -0.165                 | -0.803             | -0.011                   | -0.165                   |
| NiPd | 1.685                | 0.059                  | -0.827             | 0.000                    | -0.146                   |
| FePd | 1.676                | -0.205                 | -0.816             | 0.000                    | 0.002                    |
| PdPd | 1.682                | 0.080                  | -0.718             | 0.000                    | 0.103                    |
| CrMn | 1.658                | -0.383                 | -0.914             | -0.329                   | -0.660                   |
| MnCu | 1.686                | -0.367                 | -0.808             | 3.543                    | -0.526                   |
| MnNi | 1.704                | -0.234                 | -0.730             | 3.414                    | -0.407                   |
| MnMn | 1.722                | -0.137                 | -0.700             | 0.671                    | -0.316                   |
| MnFe | 1.667                | -0.228                 | -0.749             | 0.585                    | -0.267                   |
| PtPt | 1.676                | 0.220                  | -1.044             | 0.000                    | -0.538                   |
| CuPt | 1.647                | -0.312                 | -1.059             | 0.000                    | -0.486                   |
| NiPt | 1.667                | -0.071                 | -1.039             | 0.000                    | -0.352                   |
| MnPt | 1.631                | -0.183                 | -1.069             | 0.014                    | -0.350                   |
| FePt | 1.616                | -0.209                 | -1.055             | 0.034                    | -0.268                   |
| PdPt | 1.658                | -0.093                 | -1.024             | 0.000                    | -0.248                   |
| CrPt | 1.667                | 0.173                  | -1.012             | -0.124                   | 0.298                    |
| CrRu | 1.601                | -0.539                 | -1.331             | -0.157                   | -0.955                   |
| FeRu | 1.749                | -0.290                 | -1.099             | 0.104                    | -0.840                   |
| NiRu | 1.662                | -0.512                 | -1.194             | 0.640                    | -0.777                   |
| CuRu | 1.719                | -0.514                 | -1.188             | 0.001                    | -0.626                   |
| MnRu | 1.636                | -0.384                 | -1.133             | 0.090                    | -0.514                   |
| PdRu | 1.693                | -0.225                 | -1.131             | 0.000                    | -0.387                   |

|      |       |        |        |        |        |
|------|-------|--------|--------|--------|--------|
| PtRu | 1.742 | -0.158 | -1.024 | 0.000  | -0.343 |
| RuRu | 1.710 | -0.154 | -0.995 | 0.000  | -0.218 |
| IrIr | 1.652 | -0.423 | -1.353 | 0.000  | -1.071 |
| NiIr | 1.684 | -0.584 | -1.262 | 0.000  | -0.943 |
| PtIr | 1.690 | -0.544 | -1.276 | 0.000  | -0.936 |
| MnIr | 1.716 | -0.614 | -1.272 | -0.002 | -0.834 |
| PdIr | 1.727 | -0.497 | -1.143 | 0.000  | -0.792 |
| FeIr | 1.731 | -0.516 | -1.214 | 0.272  | -0.758 |
| CuIr | 1.744 | -0.532 | -1.197 | 0.000  | -0.706 |
| RuIr | 1.732 | -0.243 | -1.103 | 0.019  | -0.411 |
| CrNi | 1.533 | -0.377 | -0.729 | -0.209 | -0.513 |
| NiNi | 1.566 | -0.037 | -0.639 | 0.000  | -0.258 |
| NiCu | 1.575 | -0.196 | -0.644 | -0.225 | -0.247 |
| CrIr | 1.637 | -0.179 | -1.057 | -0.236 | -0.274 |
| CrCr | 1.799 | -0.004 | -0.563 | 0.069  | -0.004 |
| CrCu | 1.591 | -0.328 | -0.765 | -0.055 | -0.502 |
| CuCu | 1.562 | -0.122 | -0.722 | 0.008  | -0.444 |

**Table S4.** Detailed analysis of water adsorption on MN-gCN surfaces. This table provides a comprehensive dataset for H<sub>2</sub>O interaction with various transition metal (TM) on MN-gCN surfaces. It includes the metal pair (MN), the TM involved in the primary interaction with H<sub>2</sub>O (H<sub>2</sub>O-TM), the distance between H<sub>2</sub>O and TM (H<sub>2</sub>O-TM distance in Å), the Bader charge of H<sub>2</sub>O\*, and the integrated crystal orbital Hamilton population (iCOHP) for the H<sub>2</sub>O-TM interaction.

| MN   | H <sub>2</sub> O-TM | H <sub>2</sub> O-TM distance (eV) | H <sub>2</sub> O* Bader charge (e) | H <sub>2</sub> O-TM iCOHP (eV) |
|------|---------------------|-----------------------------------|------------------------------------|--------------------------------|
| FeFe | O-Fe                | 2.236                             | 0.015                              | -0.399                         |
| MnFe | O-Fe                | 2.190                             | 0.024                              | -0.378                         |
| FeCu | O-Fe                | 2.177                             | 0.043                              | -0.367                         |
| FeNi | O-Fe                | 2.160                             | -0.022                             | -0.405                         |
| FePd | O-Fe                | 2.358                             | -0.022                             | -0.308                         |
| FePt | O-Fe                | 2.388                             | -0.095                             | -0.273                         |
| FeCo | O-Fe                | 2.190                             | 0.037                              | -0.356                         |
| FeIr | O-Fe                | 2.304                             | -0.023                             | -0.248                         |
| CoNi | O-Co                | 2.118                             | 0.029                              | -0.390                         |
| CoPt | O-Co                | 2.319                             | -0.071                             | -0.280                         |
| CoPd | O-Co                | 2.076                             | -0.003                             | -0.420                         |
| CoIr | O-Co                | 2.116                             | -0.117                             | -0.411                         |
| CoCu | O-Co                | 2.182                             | -0.013                             | -0.431                         |
| CrCo | O-Co                | 2.091                             | -0.003                             | -0.473                         |
| CoCo | O-Co                | 2.094                             | 0.019                              | -0.385                         |
| CrFe | O-Cr                | 2.254                             | 0.052                              | -0.962                         |
| CrNi | O-Cr                | 2.267                             | 0.006                              | -0.398                         |
| CrPt | O-Cr                | 2.828                             | -0.115                             | -0.098                         |
| CrCr | O-Cr                | 2.058                             | 0.002                              | -0.829                         |
| CrMn | O-Cr                | 2.093                             | 0.026                              | -0.704                         |
| CrIr | O-Cr                | 2.098                             | -0.011                             | -0.766                         |
| CrRu | O-Cr                | 2.214                             | -0.036                             | -0.648                         |
| CrCu | O-Cr                | 2.383                             | 0.004                              | -0.374                         |
| CrPd | O-Cr                | 2.523                             | -0.040                             | -0.177                         |
| MnMn | O-Mn                | 2.204                             | 0.010                              | -0.464                         |
| MnIr | O-Mn                | 2.220                             | -0.009                             | -0.418                         |
| MnRu | O-Mn                | 2.390                             | -0.047                             | -0.415                         |
| MnNi | O-Mn                | 2.337                             | -0.080                             | -0.337                         |
| MnCu | O-Mn                | 2.264                             | 0.022                              | -0.314                         |
| MnPt | O-Mn                | 2.392                             | -0.116                             | -0.281                         |
| MnPd | O-Mn                | 2.329                             | 0.002                              | -0.268                         |
| MnCo | O-Mn                | 2.281                             | -0.011                             | -0.294                         |
| PtRu | O-Ru                | 2.118                             | -0.014                             | -0.791                         |
| CuRu | O-Ru                | 2.232                             | 0.010                              | -0.753                         |
| NiRu | O-Ru                | 2.441                             | -0.024                             | -0.542                         |
| FeRu | O-Ru                | 2.253                             | 0.012                              | -0.716                         |
| PdRu | O-Ru                | 2.263                             | -0.016                             | -0.726                         |
| CoRu | O-Ru                | 2.217                             | 0.010                              | -0.661                         |
| RuRu | O-Ru                | 3.378                             | -0.249                             | -0.007                         |



|      |      |       |        |        |
|------|------|-------|--------|--------|
| NiIr | O-Ir | 3.231 | -0.172 | 0.000  |
| IrIr | O-Ir | 2.864 | -0.126 | -0.119 |
| PtIr | O-Ir | 2.217 | -0.489 | -0.822 |
| RuIr | O-Ir | 2.554 | -0.040 | -0.330 |
| CuIr | O-Ir | 2.409 | -0.007 | -0.187 |
| NiPd | O-Ni | 2.593 | -0.055 | -0.107 |
| NiPt | O-Ni | 2.641 | -0.108 | -0.078 |
| NiNi | O-Ni | 2.332 | -0.019 | -0.129 |
| PdIr | O-Pd | 3.114 | -0.184 | 0.003  |
| PdPt | O-Pd | 2.939 | -0.163 | -0.032 |
| PdPd | O-Pd | 2.898 | -0.169 | -0.082 |
| CuPd | O-Cu | 2.454 | -0.001 | -0.115 |
| CuPt | O-Cu | 2.546 | -0.190 | -0.128 |
| CuCu | O-Cu | 2.234 | -0.047 | -0.261 |
| NiCu | O-Cu | 2.413 | -0.017 | -0.542 |
| PtPt | O-Pt | 3.192 | -0.240 | -0.005 |

---

**Table S5.** Comparative Adsorption Energies for Different Metal Combinations. This table presents the adsorption energies ( $\Delta G$ ) in eV for water ( $H_2O^*$ ), hydroxyl ( $H^*-OH^*$ ), and hydroxide ( $OH^*$ ) on various SAD surfaces. Each row corresponds to a unique metal combination (MN), showing how their interaction influences the adsorption energy of these three species.

| MN   | $\Delta G_{(H_2O^*)}$<br>(eV) | $\Delta G_{(H^*-OH^*)}$<br>(eV) | $\Delta G_{(OH^{*+1/2}H_2)}$<br>(eV) |
|------|-------------------------------|---------------------------------|--------------------------------------|
| FeFe | -0.891                        | 0.616                           | -0.31                                |
| MnFe | -0.594                        | -0.132                          | -0.418                               |
| FeCu | -0.401                        | 0.002                           | -0.007                               |
| FeNi | -0.381                        | 0.267                           | -0.017                               |
| FePd | -0.309                        | 0.662                           | -0.251                               |
| FePt | -0.285                        | 0.509                           | 0.198                                |
| FeCo | -0.243                        | 0.044                           | -0.62                                |
| FeIr | 0.001                         | -0.457                          | -0.079                               |
| CoNi | -0.736                        | 0.68                            | -0.359                               |
| CoPt | -0.42                         | 0.554                           | -0.239                               |
| CoPd | -0.292                        | 0.828                           | -0.217                               |
| CoIr | -0.203                        | -0.46                           | 0                                    |
| CoCu | -0.167                        | 0.48                            | -0.833                               |
| CrCo | -0.139                        | -0.516                          | -0.495                               |
| CoCo | -0.107                        | -0.325                          | -0.386                               |
| CrFe | -0.863                        | -0.434                          | 0.048                                |
| CrNi | -0.768                        | 0.319                           | -0.168                               |
| CrPt | -0.71                         | -0.05                           | -0.099                               |
| CrCr | -0.656                        | 0.131                           | -0.036                               |
| CrMn | -0.633                        | 0.5                             | -0.917                               |
| CrIr | -0.612                        | -0.197                          | 0.636                                |
| CrRu | -0.49                         | -0.937                          | 0.265                                |
| CrCu | -0.187                        | -0.332                          | -0.326                               |
| CrPd | -0.055                        | -0.304                          | 0.075                                |
| MnMn | -0.5                          | -0.441                          | -0.704                               |
| MnIr | -0.445                        | -0.267                          | 0.317                                |
| MnRu | -0.375                        | -0.467                          | -0.002                               |
| MnNi | -0.309                        | 0.363                           | -0.372                               |
| MnCu | -0.261                        | -0.225                          | -0.037                               |
| MnPt | -0.255                        | 0.49                            | -0.236                               |
| MnPd | -0.235                        | 0.467                           | -0.082                               |
| MnCo | -0.211                        | -0.098                          | -0.368                               |
| CuRu | -0.634                        | -0.14                           | 0.074                                |
| NiRu | -0.535                        | -0.344                          | 0.388                                |
| FeRu | -0.433                        | -0.221                          | 0.05                                 |
| PtRu | -0.387                        | -0.06                           | -0.426                               |
| PdRu | -0.359                        | 0.226                           | -0.444                               |
| CoRu | -0.115                        | -0.811                          | -0.2                                 |
| RuRu | -0.057                        | -0.206                          | 0.242                                |
| NiIr | -0.604                        | 0.441                           | -0.188                               |
| IrIr | -0.339                        | -0.534                          | 0.421                                |

|      |        |        |        |
|------|--------|--------|--------|
| PtIr | -0.141 | 0.175  | 0.092  |
| RuIr | 0.133  | -0.815 | 0.354  |
| CuIr | -0.016 | -0.187 | 0.158  |
| NiPd | -0.006 | 0.639  | 0.464  |
| NiPt | 0.035  | 1.037  | -0.293 |
| NiNi | 0.1    | 0.396  | -0.296 |
| PdIr | -0.14  | 0.403  | -0.317 |
| PdPt | 0.091  | 0.518  | 0.463  |
| PdPd | 0.053  | 1.457  | -0.224 |
| CuPd | -0.188 | 0.376  | 0.622  |
| CuPt | -0.118 | 0.789  | -0.169 |
| CuCu | -0.086 | -0.08  | -0.131 |
| NiCu | -0.018 | -0.131 | -0.014 |
| PtPt | -0.039 | 1.578  | -0.141 |

## Detailed Analysis of the Electronic Descriptor ( $\varphi$ ) in Catalysis

Within the framework of our study, the electronic descriptor ( $\varphi$ ) emerges as a pivotal indicator for evaluating and predicting the catalytic activity of transition metal-based catalysts, particularly in the context of the Hydrogen Evolution Reaction (HER). This descriptor is meticulously derived from two fundamental properties of transition metals: the number of d electrons ( $N_d$ ) and their electronegativity ( $E_{TM}$ ). The integration of these parameters into  $\varphi$  allows for a comprehensive assessment of the electronic environment and its impact on the catalytic functionality of dual-atom catalysts (DACs).

The number of d electrons ( $N_d$ ) significantly influences the density of states at the Fermi level, which is crucial for the adsorption of reactants and the subsequent catalytic processes. Electronegativity ( $E_{TM}$ ), on the other hand, affects the strength of the adsorptive bond between the catalyst surface and the reactants or intermediates, thereby influencing the activation barriers and the desorption of reaction products. The descriptor  $\varphi$ , therefore, encapsulates the interplay between these electronic properties, guiding the optimization of catalyst design for enhanced HER performance.

To provide a deeper understanding of the role of  $\varphi$  in catalysis, this section of the Supplementary Information includes a series of computational analyses that demonstrate the relationship between the  $\varphi$  values and the catalytic efficiency observed in various DACs. By highlighting the correlation between specific  $\varphi$  values (derived from  $N_d$  and  $E_{TM}$ ) and the enhanced activity in HER, we aim to underscore the predictive power of this electronic descriptor in identifying high-performance catalysts.

This detailed exposition on the electronic descriptor ( $\varphi$ ), derived from the integration of  $N_d$  and  $E_{TM}$ , enriches our understanding of the electronic factors that govern the catalytic activity of transition metals. By delving into the significance of  $\varphi$  in the catalytic process, especially in the realm of hydrogen production, we contribute to the foundational knowledge necessary for the rational design and development of next-generation catalysts for sustainable energy technologies.

**Table S6.** Descriptor and Reactivity Parameters for Metal Dimers on gCN. This table lists the

$$\varphi = \frac{N_d}{\sqrt{E_{TM}}}$$

calculated descriptor ( $\varphi$ ), which combines the d electron count ( $N_d$ ) and the electronegativity ( $e_{TM}$ ) of transition metal (TM) atoms, dissociation energy ( $E_{diss}$ ), and activation energy ( $E_a$ ) for various homonuclear and heteronuclear metal dimers supported on g-CN. The descriptor  $\varphi$  serves as a simplified indicator of the electronic properties influencing the reactivity of the dimers.

| MN   | $\varphi$ | $E_{diss}$ (eV) | $E_a$ (eV) |
|------|-----------|-----------------|------------|
| CoCo | 5.11      | -0.765          | 1.103      |
| CuCu | 7.25      | -0.162          | 1.179      |
| CrCu | 5.62      | -0.641          | 1.558      |
| CrCo | 4.51      | -0.769          | 0.421      |
| MnMn | 4.02      | -0.828          | 0.631      |
| MnCo | 4.58      | -0.615          | 0.924      |
| NiCu | 6.52      | -0.048          | 2.313      |
| MnCu | 5.71      | -0.828          | 1.245      |
| FeRu | 4.58      | -1.096          | 0.328      |

|      |      |        |       |
|------|------|--------|-------|
| FeCo | 4.77 | -0.28  | 1.925 |
| NiNi | 5.79 | 0.356  | 2.095 |
| PtIr | 5.35 | 0.254  | 0.749 |
| PtRu | 5.35 | 0.185  | 0.995 |
| CuIr | 5.94 | -0.255 | 1.284 |
| FeIr | 4.58 | -1.407 | 0.417 |
| CrPd | 5.4  | -0.918 | 1.775 |
| FeCu | 5.86 | -0.574 | 1.602 |

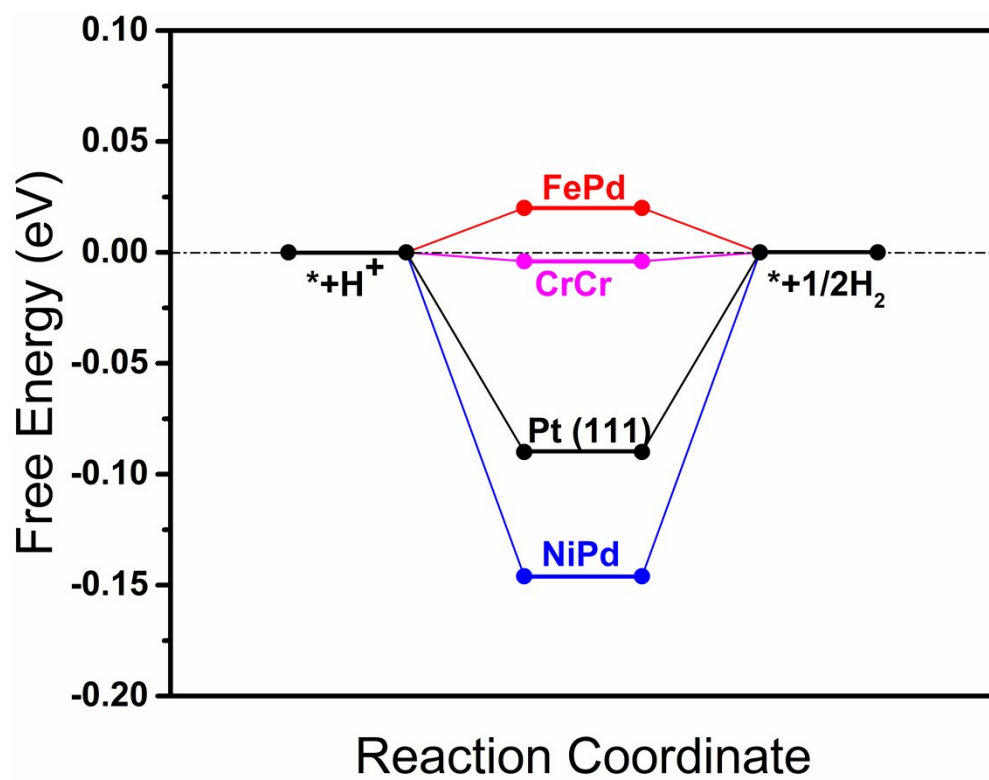

**Figure S1.** Free energy diagrams for hydrogen adsorption at active sites of FePd-gCN (0.02eV), CrCr-gCN (-0.004eV), NiPd-gCN (-0.146eV), and Pt(111) (-0.09eV)<sup>S1</sup>.

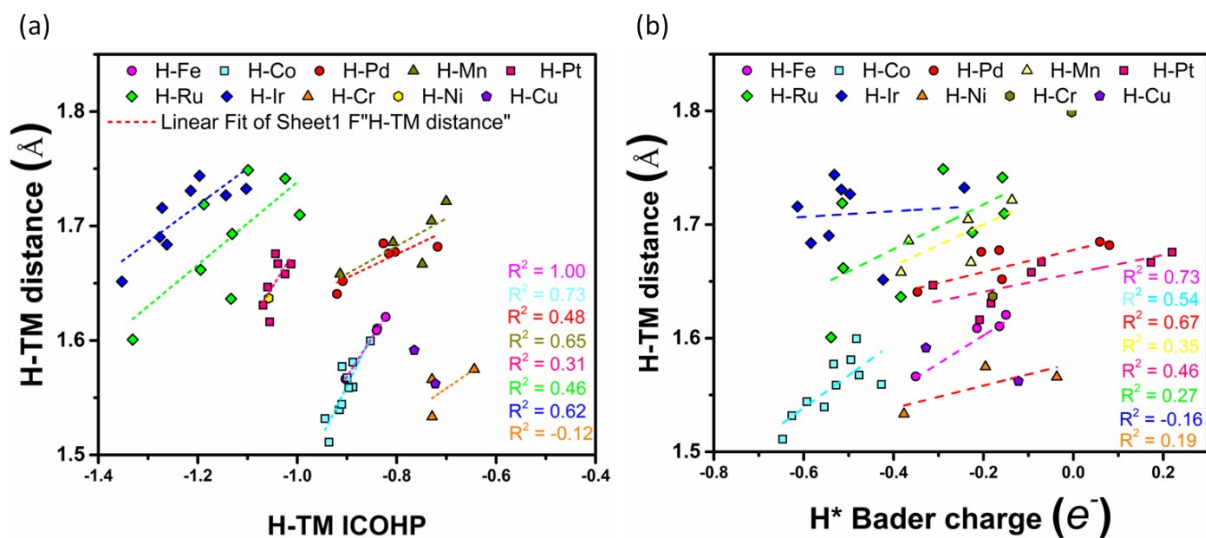

**Figure S2.** Comparative analysis of H-TM distance versus electronic properties for various transition metals (TM) bonded with hydrogen. (a) illustrates the relationship between H-TM bond distance and H-TM integrated crystal orbital Hamilton population (ICOHP), with each point representing a different TM-H pair. (b) demonstrates the correlation between H-TM distance and the Bader charge  $H^*$ .

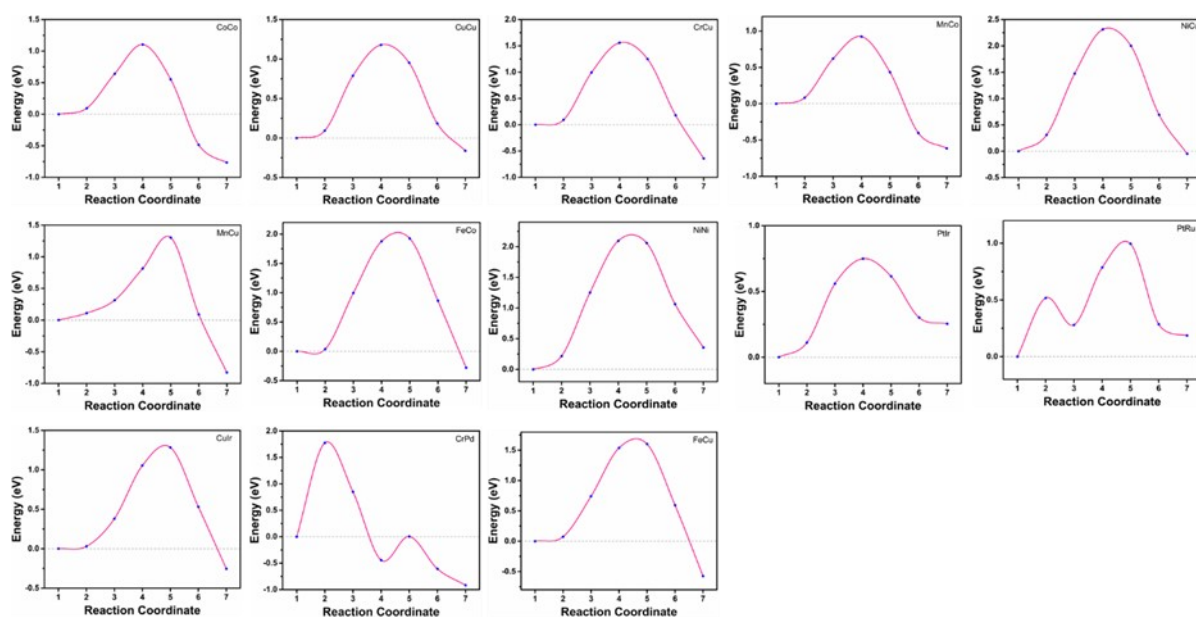

**Figure S3.** Computed energy barriers for H<sub>2</sub>O dissociation on selected MN-gCN surfaces. This figure illustrates the results of the Nudged Elastic Band (NEB) method calculations, showing the energy barriers for water dissociation on various MN-gCN surfaces that have been identified as energetically favorable based on free energy profiles. Each panel corresponds to a different metal dimer configuration on the gCN substrate, detailing the energy variation along the reaction coordinate.



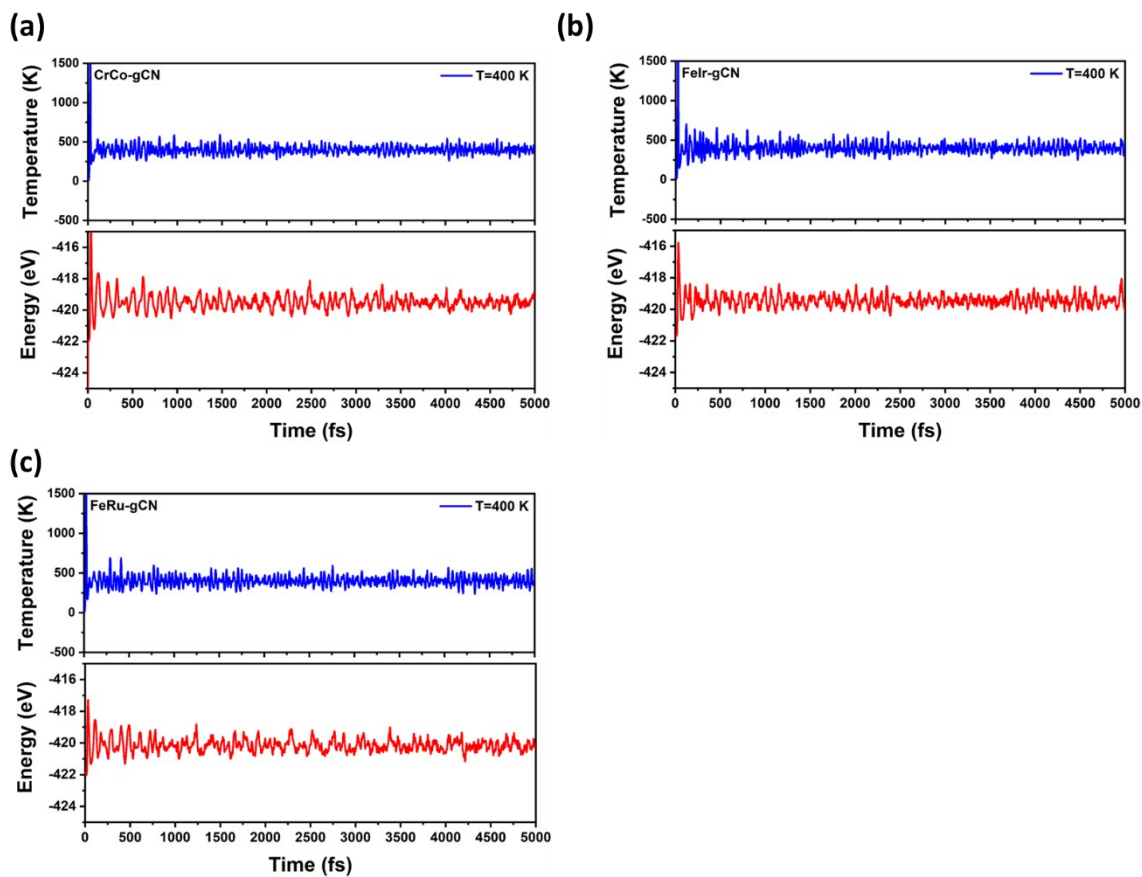

**Figure S4.** Molecular dynamics simulation results at 400 K for (a) CrCo-gCN, (b) FeIr-gCN, and (c) FeRu-gCN structures over 5000 fs. The upper panels show the temperature profiles and the lower panels display the total energy levels, validating the structural stability of the DACs on the defected g-CN substrate.

## References

<sup>S1</sup>Wang, P., Zhang, X., Zhang, J. *et al.* Precise tuning in platinum-nickel/nickel sulfide interface nanowires for synergistic hydrogen evolution catalysis. *Nat Commun* **8**, 14580 (2017).
